# Supplementary material for: The influence of vegetation on the ITCZ and South Asian monsoon in HadCM3
Source: Copernicus journal article supplement (doi:10.5194/esd-3-87-2012), 2012-06-22
Supplement: Supplementary file 1 [file esd-3-87-2012-supplement.pdf]

# **The influence of vegetation on the ITCZ and South Asian Monsoon in HadCM3**

**M. P. McCarthy<sup>1</sup>, J. Sanjay<sup>2</sup>, B. B. B. Booth<sup>1</sup>, K. Krishnakumar<sup>2</sup>, and R. A. Betts<sup>1</sup>**

<sup>1</sup>Met Office, Hadley Centre, Fitzroy Road, Exeter, EX1 2NY, UK

<sup>2</sup>Indian Institute of Tropical Meteorology, Pashan, Pune 411008, India

Correspondence to: M. P. McCarthy  
([mark.mccarthy@metoffice.gov.uk](mailto:mark.mccarthy@metoffice.gov.uk))

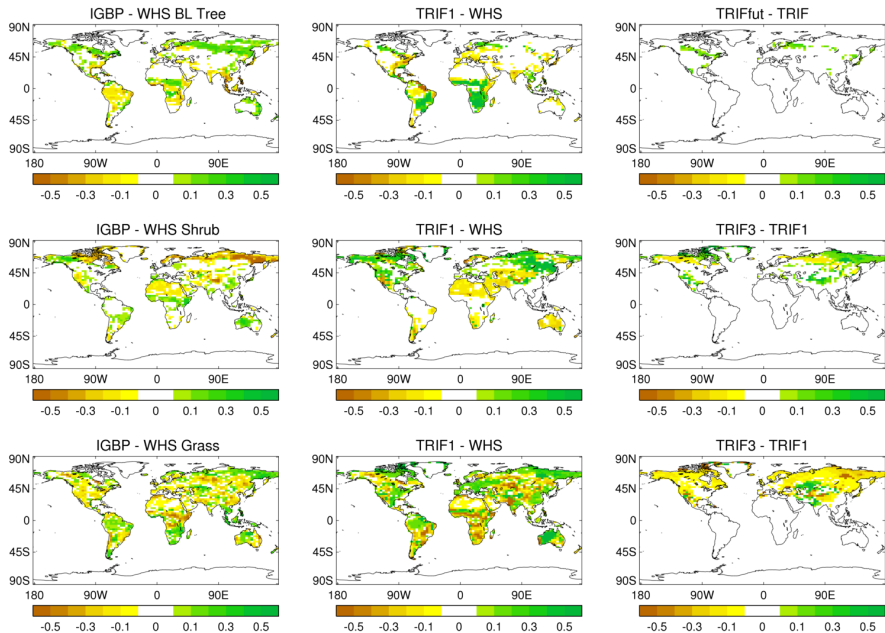

**Fig. 1.** Difference in vegetation cover (as a fraction of each model grid cell) compared to WHS of (left) IGBP and (middle) TRIF and between (right) TRIFut and TRIF. The upper row represents the difference in Broadleaf tree (BL), middle panel to shrub, and lower panel grass.

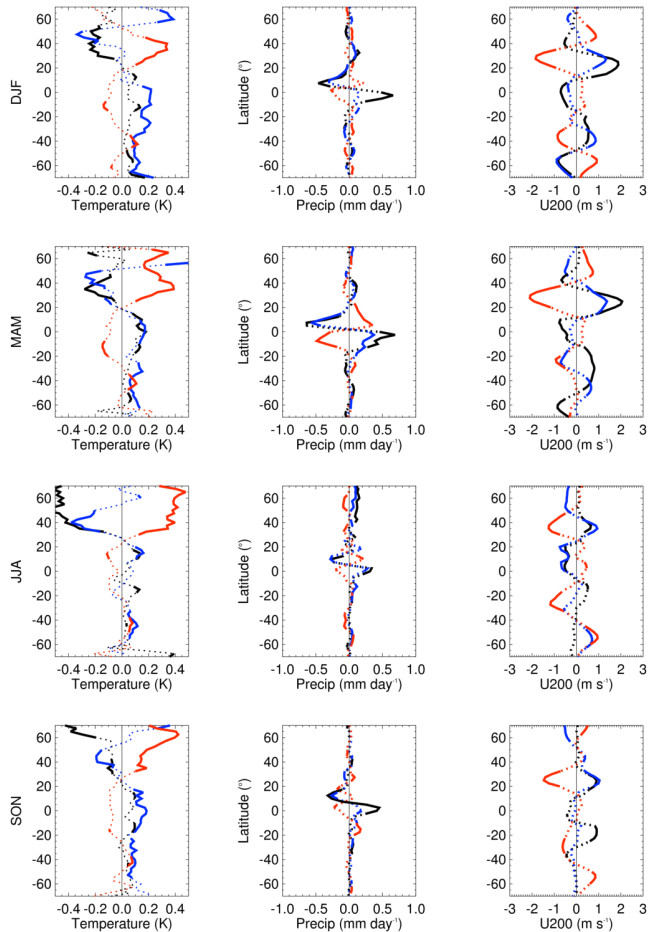

**Fig. 2.** Climate impact of imposed vegetation on (left) near surface air temperature, (middle) precipitation, and (right) 200 hPa zonal wind. The zonal mean differences between (black) IGBP-WHS, (blue) TRIF-WHS, and (red) TRIFut-TRIF are shown for (top to bottom) DJF, MAM, JJA, and SON. Unbroken segments represent regions where the difference is statistically significant at the 5% level based on

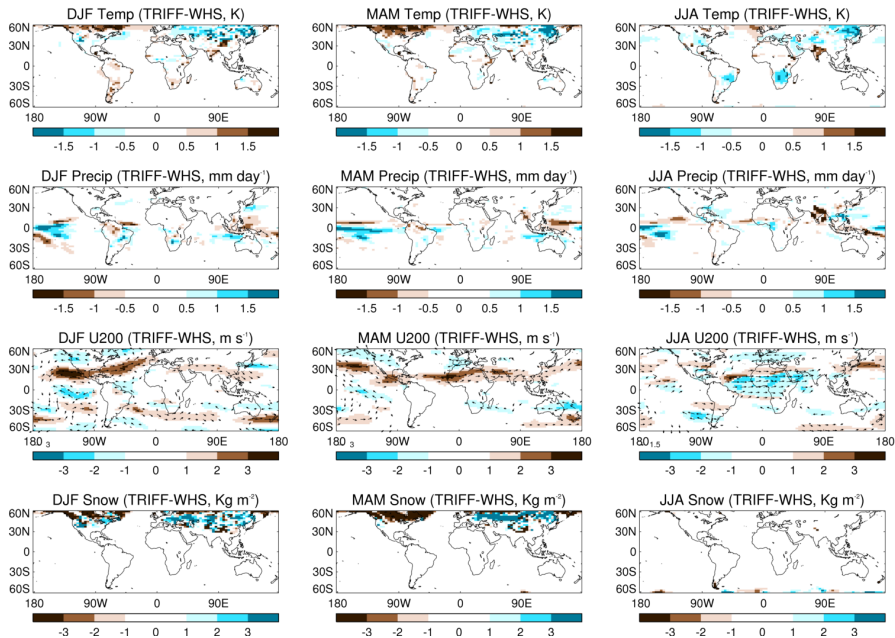

**Fig. 3.** Regional differences between TRIF and WHS for annual means of (top to bottom) temperature, precipitation, 200 hPa zonal wind, and snow cover, for seasons (left) DJF, (middle) MAM, and (right) JJA. The wind vector anomalies are also included in the U200 plots.
